# Supplementary material for: Mg-doped SrTiO 3 photocatalyst with Ag–Co cocatalyst for enhanced selective conversion of CO 2 to CO using H 2 O as the electron donor
Source: Royal Society of Chemistry journal article supplement (doi:10.1039/d3cy00576c), 2023-01-01
Supplement: d3cy00576c1.pdf [file d3cy00576c1.pdf]

# **Mg-doped SrTiO<sub>3</sub> Photocatalyst with Ag–Co Cocatalyst for Enhanced Selective Conversion of CO<sub>2</sub> to CO Using H<sub>2</sub>O as the Electron Donor**

Takechi NAKAMOTO<sup>†</sup>, Shoji IGUCHI<sup>†, \*</sup>, Shimpei NANIWA<sup>†</sup>, Tsunehiro TANAKA<sup>†, ‡</sup>,  
and Kentaro TERAMURA<sup>†, ‡, #, \*</sup>

<sup>†</sup> Department of Molecular Engineering, Graduate School of Engineering, Kyoto  
University, Kyoto-daigaku Katsura, Nishikyo-ku, Kyoto 615–8510, Japan

<sup>‡</sup> Elements Strategy Initiative for Catalysts & Batteries (ESICB), Kyoto University, 1-30  
Goryo–Ohara, Nishikyo–ku, Kyoto 615–8245, Japan

<sup>#</sup> Fukui Institute for Fundamental Chemistry, Kyoto University, Takano Nishibiraki-cho  
34-4, Sakyo-ku, Kyoto 606-8103, Japan

## **Corresponding Authors**

Shoji IGUCHI: [iguchi.shoji.4k@kyoto-u.ac.jp](mailto:iguchi.shoji.4k@kyoto-u.ac.jp)

Kentaro TERAMURA: [teramura.kentaro.7r@kyoto-u.ac.jp](mailto:teramura.kentaro.7r@kyoto-u.ac.jp)

Keywords: CO<sub>2</sub> photoreduction, Perovskite oxides, Mg<sup>2+</sup>-doping, Edges-shaved cubes

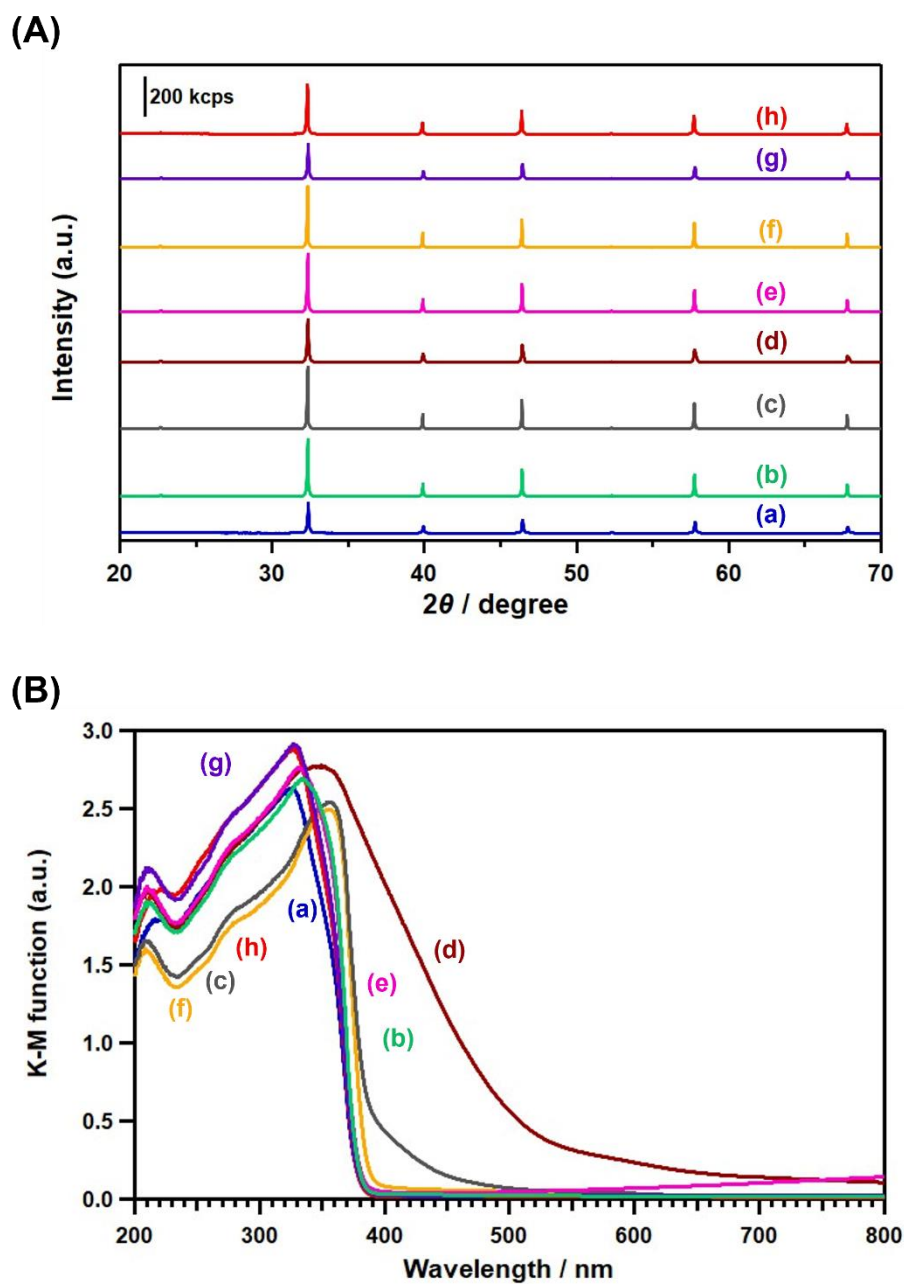

**Figure S1.** (A) XRD patterns and (B) UV-Vis DRS of (a) Al-SrTiO<sub>3</sub>, (b) Zn-SrTiO<sub>3</sub>, (c) Li-SrTiO<sub>3</sub>, (d) Mn-SrTiO<sub>3</sub>, (e) W-SrTiO<sub>3</sub>, (f) Ca-SrTiO<sub>3</sub>, (g) Y-SrTiO<sub>3</sub>, and (h) Mg-SrTiO<sub>3</sub>.

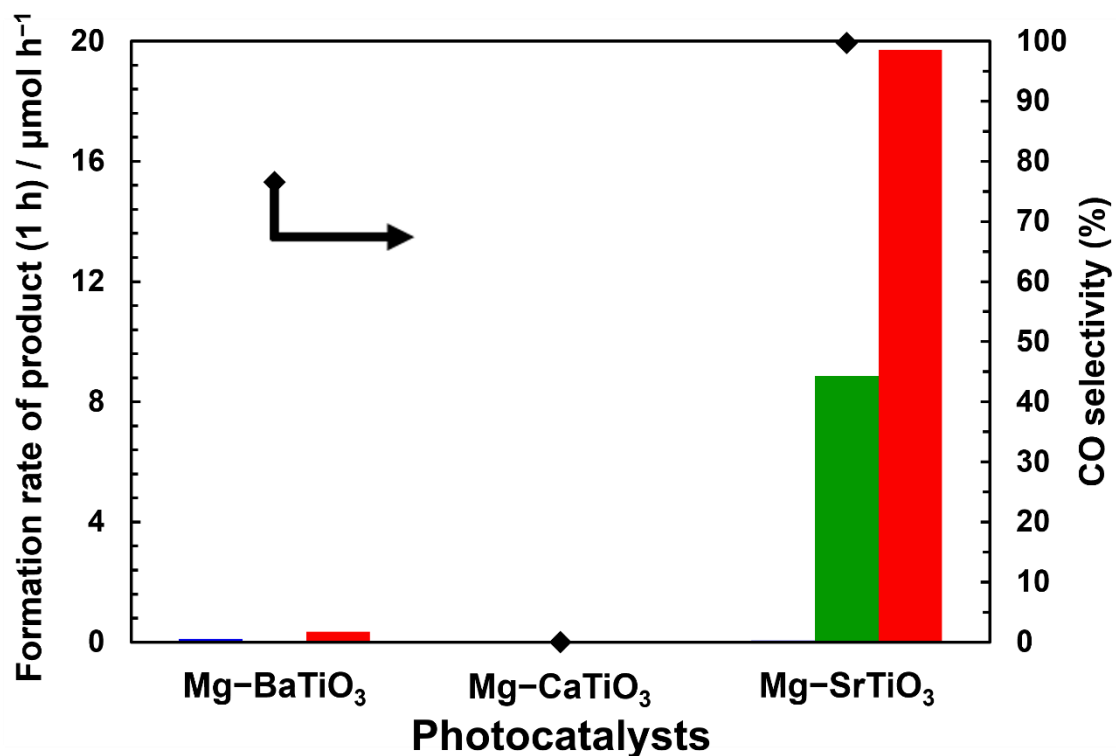

**Figure S2.** Formation rate of CO (red), H<sub>2</sub> (blue), and O<sub>2</sub> (green), and the selectivity toward CO evolution (black diamond) in the photocatalytic conversion of CO<sub>2</sub> by H<sub>2</sub>O over the Ag-Co/Mg-ATiO<sub>3</sub> photocatalysts (A = Ba, Ca, and Sr). Reaction conditions: Amount of photocatalyst: 0.2 g; Ag loading: 1 wt%; Co loading: 0.3 wt%; volume of reaction solution (H<sub>2</sub>O): 0.2 L; additive: 0.1 M NaHCO<sub>3</sub>; CO<sub>2</sub> flow rate: 30 mL min<sup>-1</sup>; light source: monochromatic LED lamp at 365 nm; photoirradiation time: 1 h.

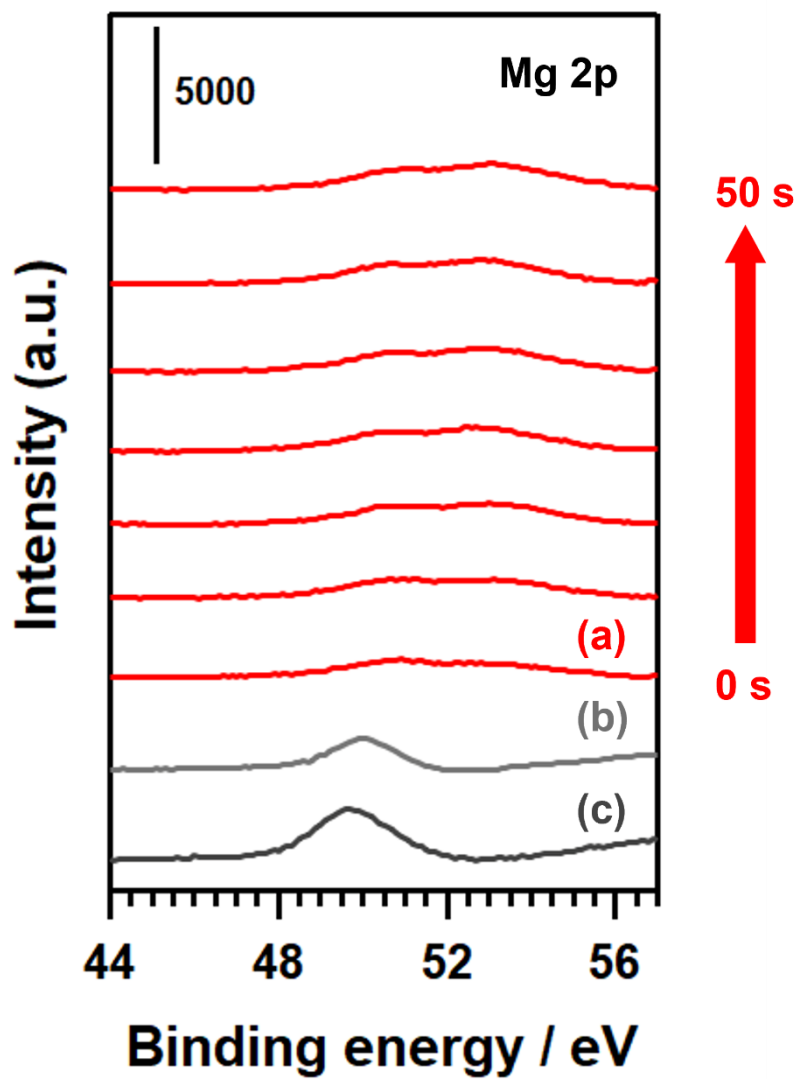

**Figure S3.** Mg 2p XPS spectra of (a) Mg-SrTiO<sub>3</sub> obtained at various Ar sputtering times, (b) Mg(OH)<sub>2</sub>, and (c) MgO.

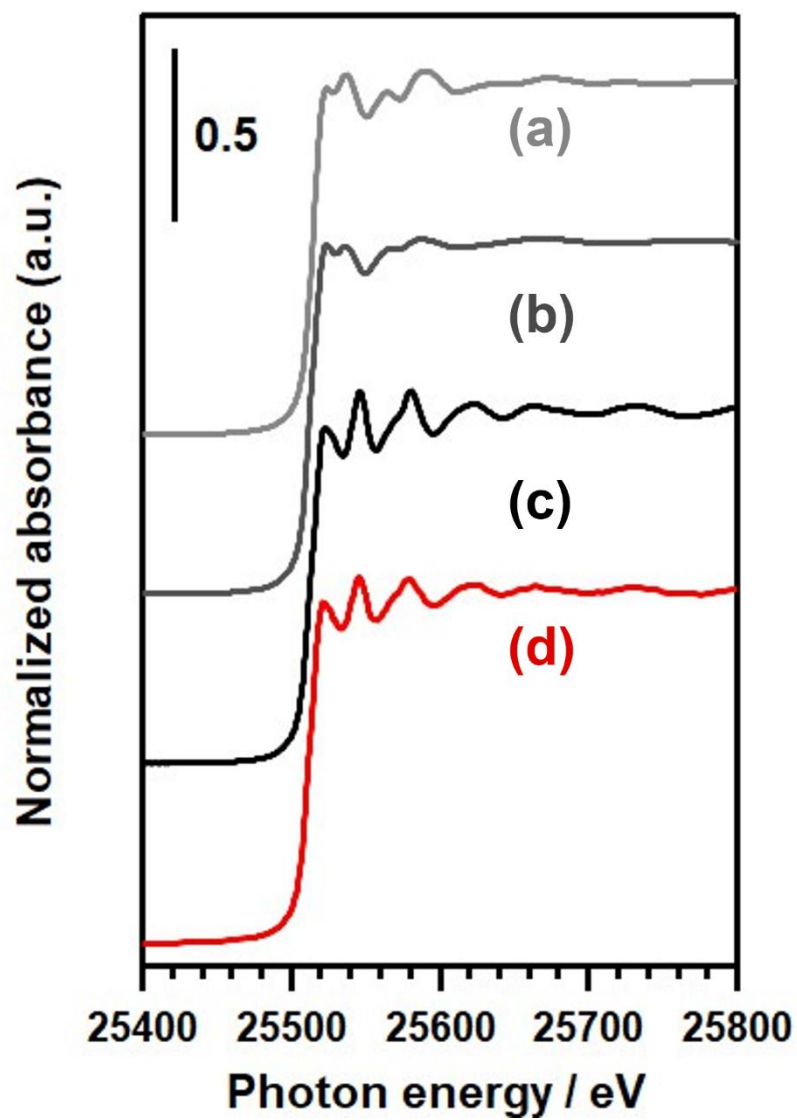

**Figure S4.** Ag K-edge X-ray absorption near edge structure (XANES) spectra of (a) AgO, (b) Ag<sub>2</sub>O, (c) Ag foil, and (d) Ag-Co/Mg-SrTiO<sub>3</sub>.

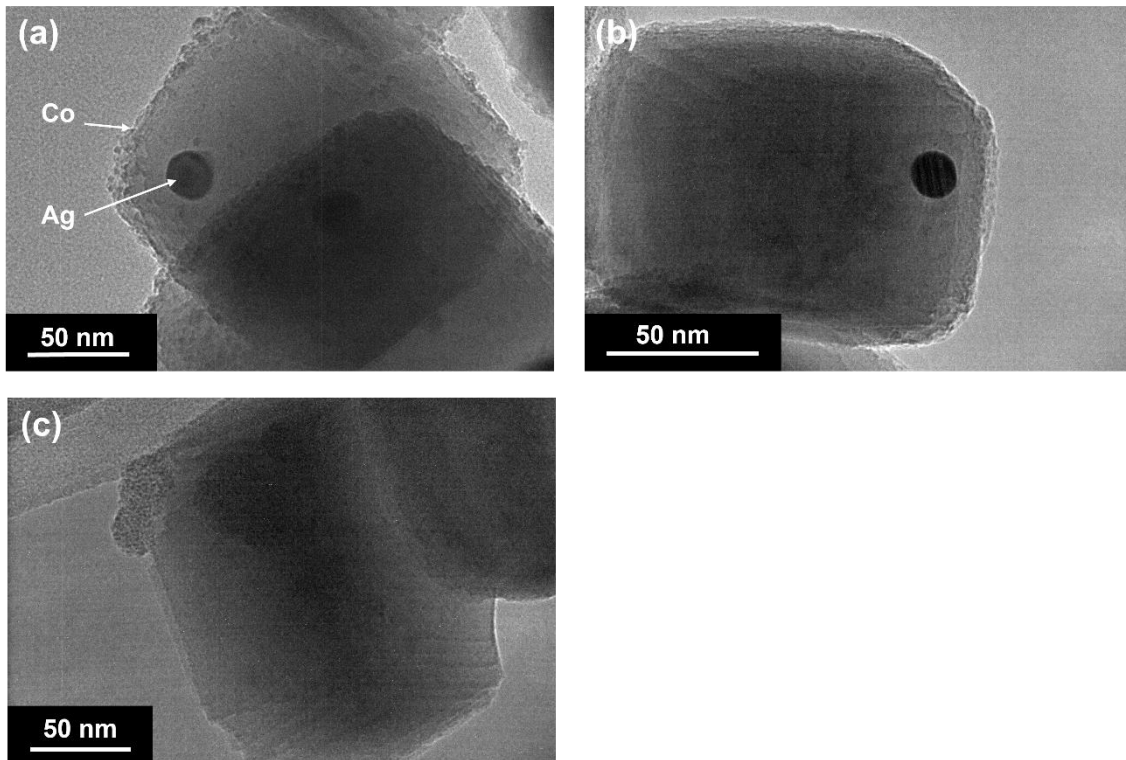

**Figure S5.** Transmission electron microscope (TEM) images of (a) Ag and Co-loaded Mg–SrTiO<sub>3</sub>, (b) Ag-loaded Mg–SrTiO<sub>3</sub>, and (c) Co-loaded Mg–SrTiO<sub>3</sub> by PD method.

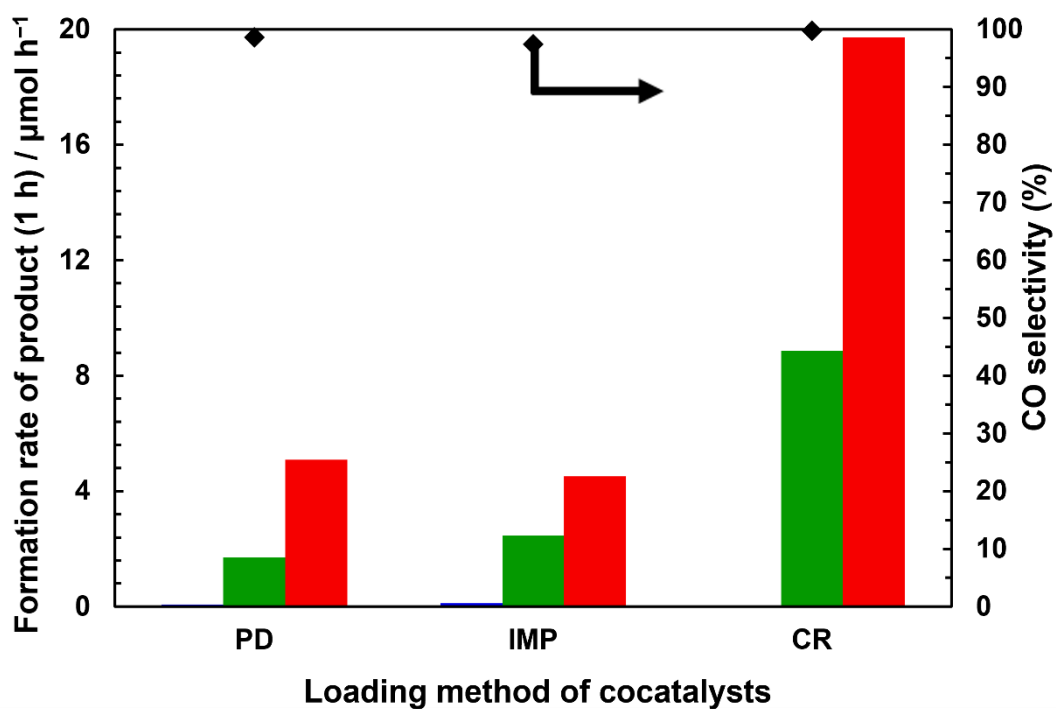

**Figure S6.** Formation rate of CO (red), H<sub>2</sub> (blue), and O<sub>2</sub> (green), and the selectivity toward CO evolution (black diamond) in the photocatalytic conversion of CO<sub>2</sub> by H<sub>2</sub>O over the Mg–SrTiO<sub>3</sub> photocatalysts in the presence of Ag–Co cocatalyst loaded by photodeposition (PD), impregnation (IMP), and chemical reduction (CR) method. Reaction conditions: Amount of photocatalyst: 0.2 g; Ag loading: 1 wt%; Co loading: 0.3 wt%; volume of reaction solution (H<sub>2</sub>O): 0.2 L; additive: 0.1 M NaHCO<sub>3</sub>; CO<sub>2</sub> flow rate: 30 mL min<sup>-1</sup>; light source: monochromatic LED lamp at 365 nm; photoirradiation time: 1 h.



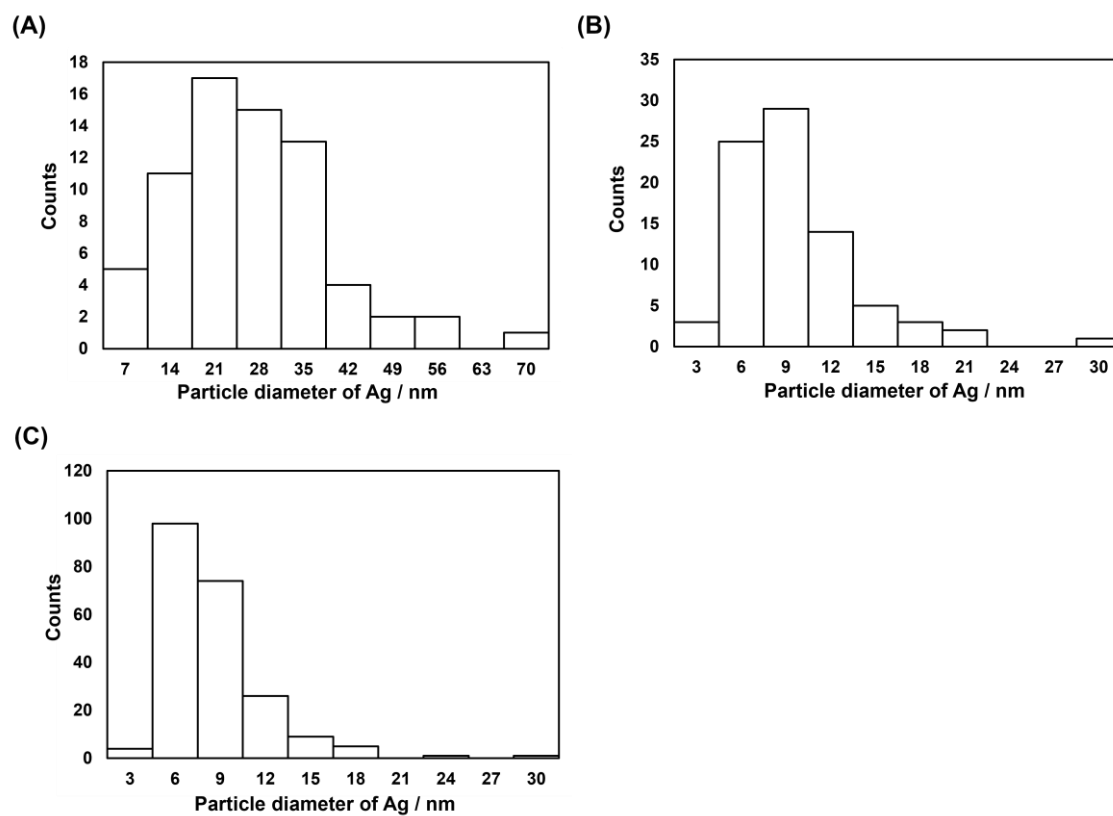

**Figure S7.** Particle diameter distributions of Ag loaded by (A) PD, (B) IMP, and (C) CR

method on the surface of Mg–SrTiO<sub>3</sub>.

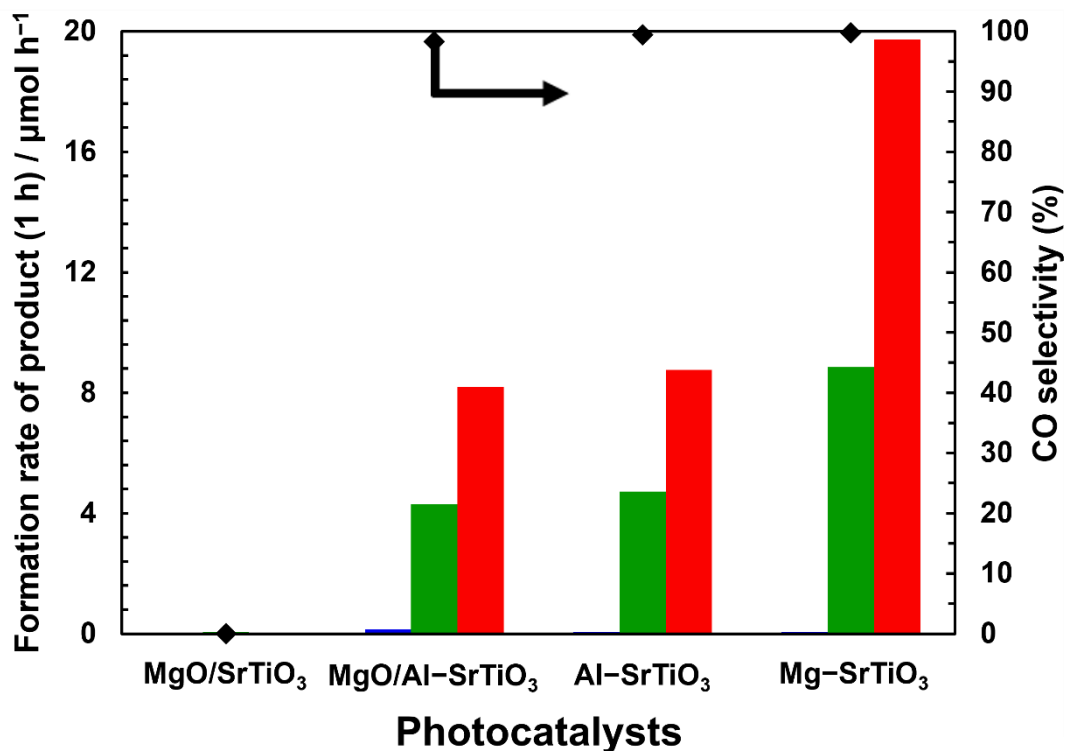

**Figure S8.** Formation rate of CO (red), H<sub>2</sub> (blue), and O<sub>2</sub> (green), and the selectivity toward CO evolution (black diamond) in the photocatalytic conversion of CO<sub>2</sub> by H<sub>2</sub>O over the Ag-Co/MgO/SrTiO<sub>3</sub>, Ag-Co/MgO/Al-SrTiO<sub>3</sub>, Ag-Co/Al-SrTiO<sub>3</sub> and Ag-Co/Mg-SrTiO<sub>3</sub> photocatalysts. Reaction conditions: Amount of photocatalyst: 0.2 g; Ag loading: 1 wt%; Co loading: 0.3 wt%; volume of reaction solution (H<sub>2</sub>O): 0.2 L; additive: 0.1 M NaHCO<sub>3</sub>; CO<sub>2</sub> flow rate: 30 mL min<sup>-1</sup>; light source: monochromatic LED lamp at 365 nm; photoirradiation time: 1 h.

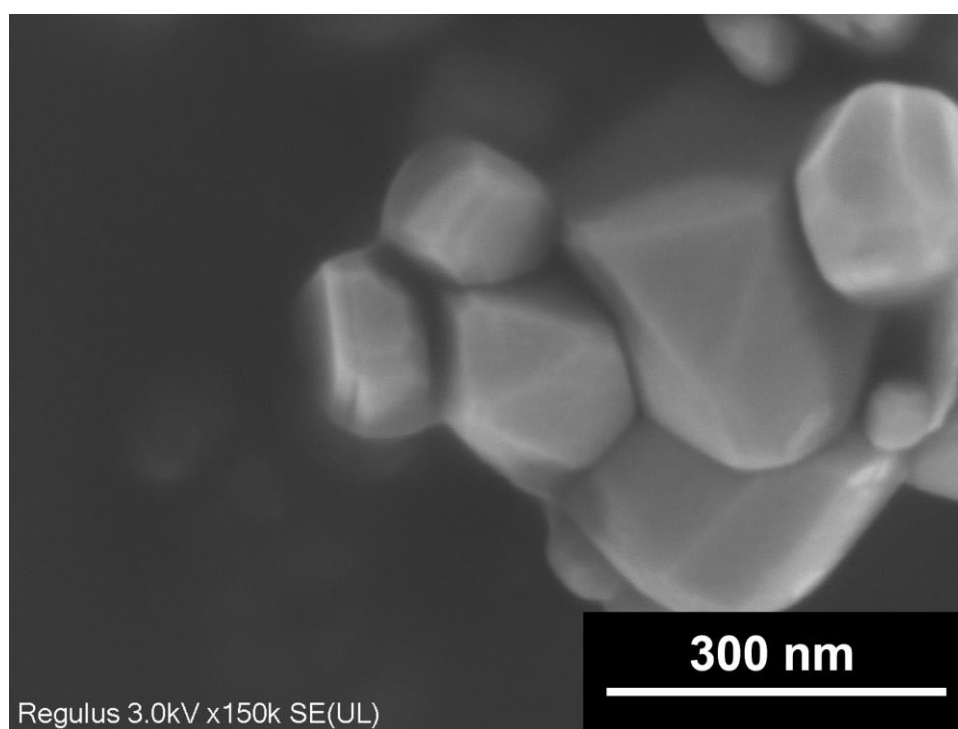

**Figure S9.** SEM image of Mg-SrTiO<sub>3</sub>\_1118 K.

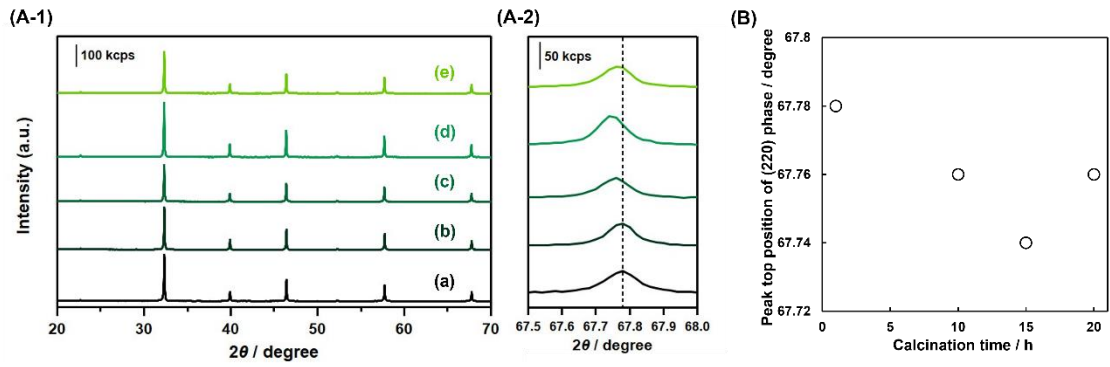

**Figure S10.** (A-1) XRD patterns of (a) pristine SrTiO<sub>3</sub>, (b) Mg-SrTiO<sub>3</sub>\_1 h, (c) Mg-SrTiO<sub>3</sub>\_10 h, (d) Mg-SrTiO<sub>3</sub>\_15 h, and (e) Mg-SrTiO<sub>3</sub>\_20 h. (A-2) is the magnified view of (a)–(e) in (A-1). (B) Dependence of calcination time on the peak top position of (220) phase.

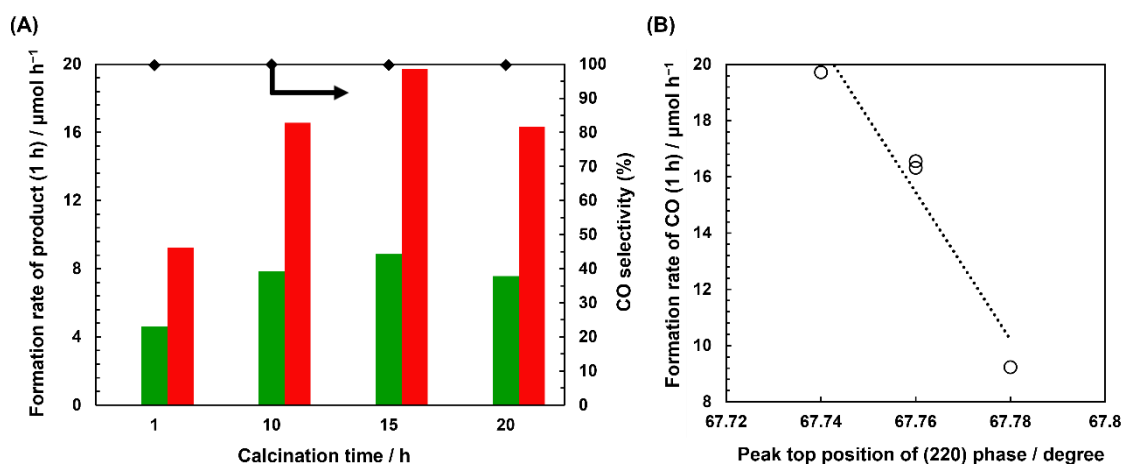

**Figure S11.** (A) Formation rate of CO (red), H<sub>2</sub> (blue), and O<sub>2</sub> (green), and the selectivity toward CO evolution (black diamond) in the photocatalytic conversion of CO<sub>2</sub> by H<sub>2</sub>O over the Ag–Co/Mg–SrTiO<sub>3</sub>\_y h photocatalysts (y = 1, 10, 15, and 20). Reaction conditions: Amount of photocatalyst: 0.2 g; Ag loading: 1 wt%; Co loading: 0.3 wt%; volume of reaction solution (H<sub>2</sub>O): 0.2 L; additive: 0.1 M NaHCO<sub>3</sub>; CO<sub>2</sub> flow rate: 30 mL min<sup>-1</sup>; light source: monochromatic LED lamp at 365 nm; photoirradiation time: 1 h.

(B) Dependence of peak top position on formation rate of CO.

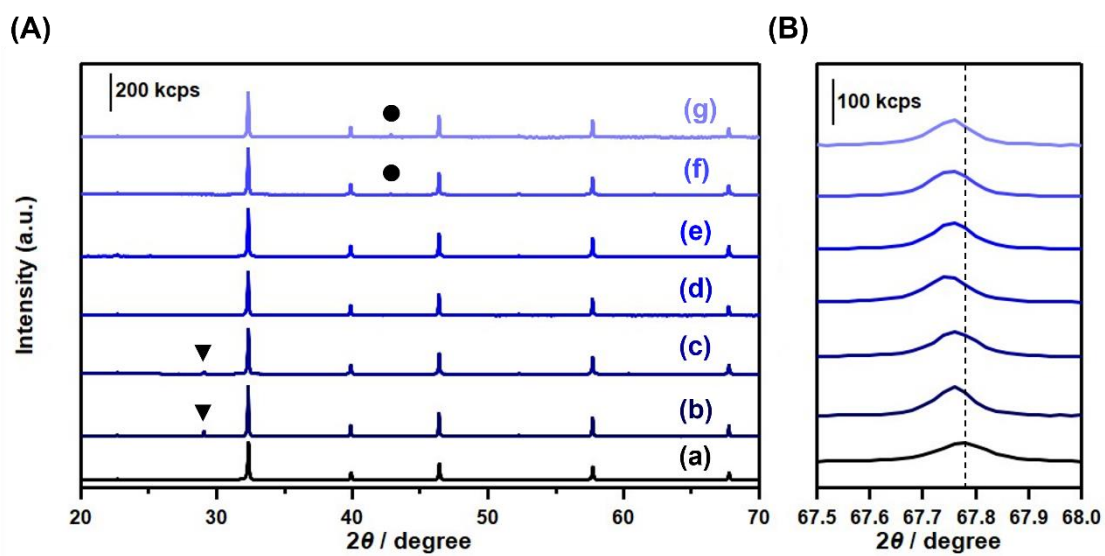

**Figure S12.** XRD patterns of (a) pristine SrTiO<sub>3</sub>, (b) Mg(0)–SrTiO<sub>3</sub>, (c) Mg(2)–SrTiO<sub>3</sub>, (d) Mg(4)–SrTiO<sub>3</sub>, (e) Mg(8)–SrTiO<sub>3</sub>, (f) Mg(24)–SrTiO<sub>3</sub>, and (g) Mg(100)–SrTiO<sub>3</sub> (▼ Y<sub>2</sub>O<sub>3</sub>, ● MgO).

**Table S1.** Actual contents of Mg, Ti, and Sr in the Mg–SrTiO<sub>3</sub>, Mg–SrTiO<sub>3</sub>\_1268 K, and Mg(2)–SrTiO<sub>3</sub> using ICP measurements, which show characteristic photocatalytic activities as presented in the main text

| Samples                      | Formation rate of CO / $\mu\text{mol h}^{-1}$ | Atomic content                                         |                                                           |
|------------------------------|-----------------------------------------------|--------------------------------------------------------|-----------------------------------------------------------|
|                              |                                               | Theoretical                                            | Experimental                                              |
| Mg–SrTiO <sub>3</sub>        | 20                                            | SrTi <sub>0.96</sub> Mg <sub>0.04</sub> O <sub>3</sub> | SrTi <sub>0.88</sub> Mg <sub>0.029</sub> O <sub>2.8</sub> |
| Mg–SrTiO <sub>3</sub> _1268K | 15                                            | SrTi <sub>0.96</sub> Mg <sub>0.04</sub> O <sub>3</sub> | SrTi <sub>1.0</sub> Mg <sub>0.025</sub> O <sub>3</sub>    |
| Mg(2)–SrTiO <sub>3</sub>     | 10                                            | SrTi <sub>0.98</sub> Mg <sub>0.02</sub> O <sub>3</sub> | SrTi <sub>0.85</sub> Mg <sub>0.017</sub> O <sub>2.7</sub> |

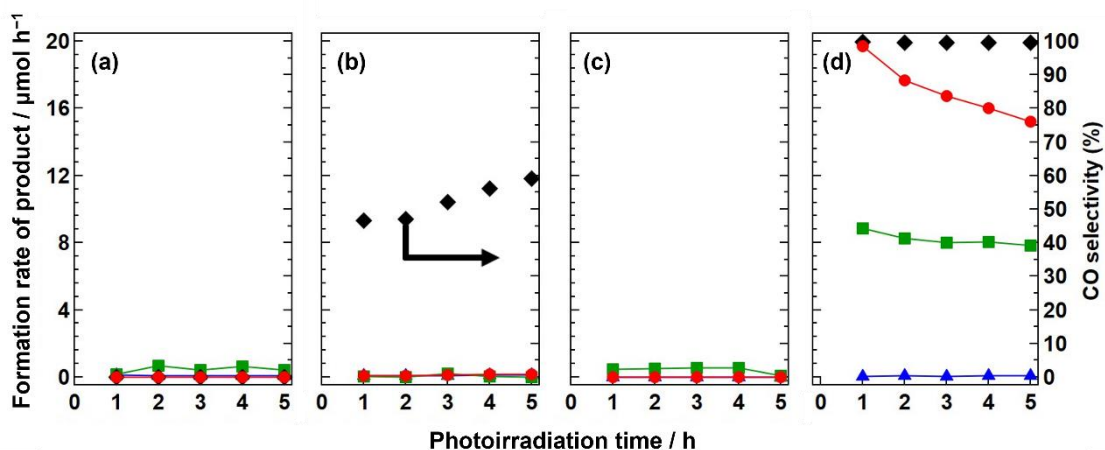

**Figure S13.** Formation rates of CO (red), H<sub>2</sub> (blue), and O<sub>2</sub> (green), and the selectivity toward CO evolution (black diamond) in the photocatalytic conversion of CO<sub>2</sub> by H<sub>2</sub>O over the Ag–Co/Mg–SrTiO<sub>3</sub> photocatalyst. (a) without photocatalyst (b) without additive (c) without photoirradiation (d) typical condition. Reaction conditions: Amount of photocatalyst: 0.2 g; Ag loading: 1 wt%; Co loading: 0.3 wt%; volume of reaction solution (H<sub>2</sub>O): 0.2 L; additive: 0.1 M NaHCO<sub>3</sub>; CO<sub>2</sub> flow rate: 30 mL min<sup>-1</sup>; light source: monochromatic LED lamp at 365 nm; photoirradiation time: 5 h.



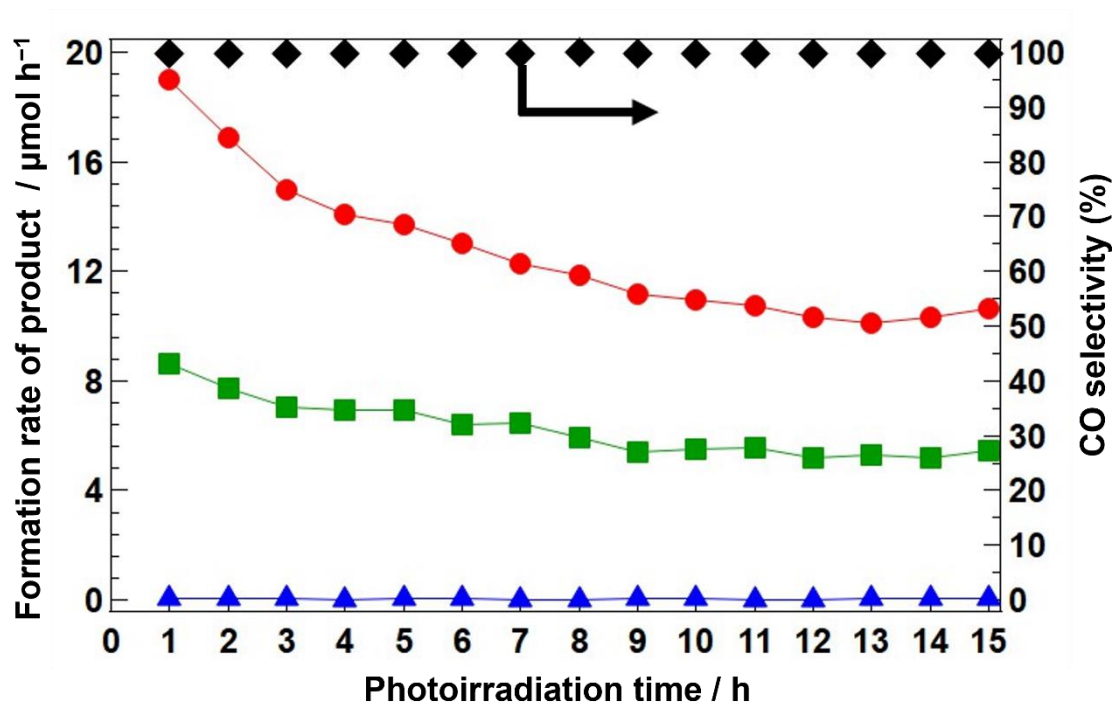

**Figure S14.** Formation rate of CO (red), H<sub>2</sub> (blue), and O<sub>2</sub> (green), and the selectivity toward CO evolution (black diamond) in the photocatalytic conversion of CO<sub>2</sub> by H<sub>2</sub>O over the Ag-Co/Mg-SrTiO<sub>3</sub> photocatalyst. Reaction conditions: Amount of photocatalyst: 0.2 g; Ag loading: 1 wt%; Co loading: 0.3 wt%; volume of reaction solution (H<sub>2</sub>O): 0.2 L; additive: 0.1 M NaHCO<sub>3</sub>; CO<sub>2</sub> flow rate: 30 mL min<sup>-1</sup>; light source: monochromatic LED lamp at 365 nm; photoirradiation time: 15 h.

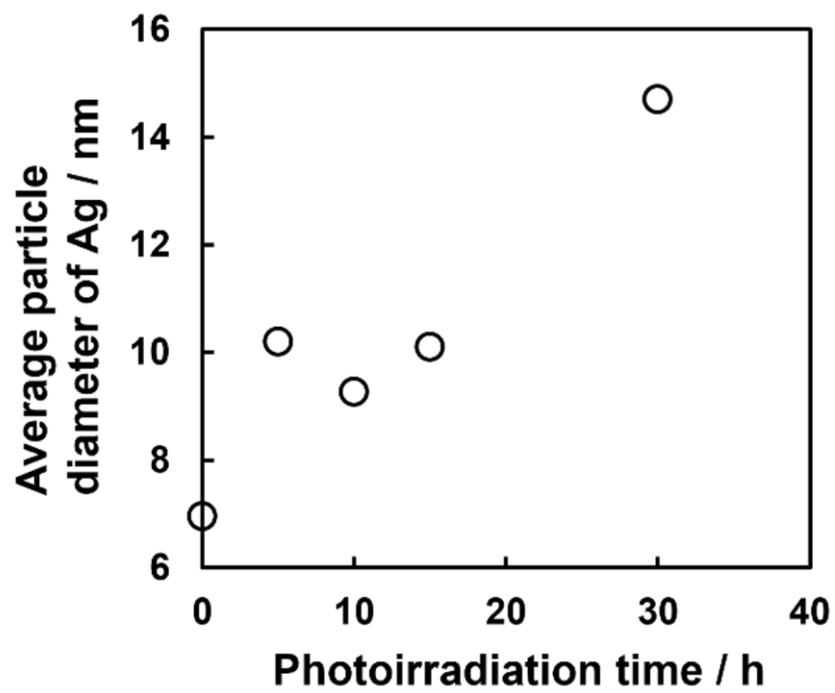

**Figure S15.** Dependency of average particle diameter of Ag cocatalyst on photoirradiation time.

**Scheme S1.** The scheme of the external-irradiation-type reaction vessel with the 365 nm monochromatic LED lamp

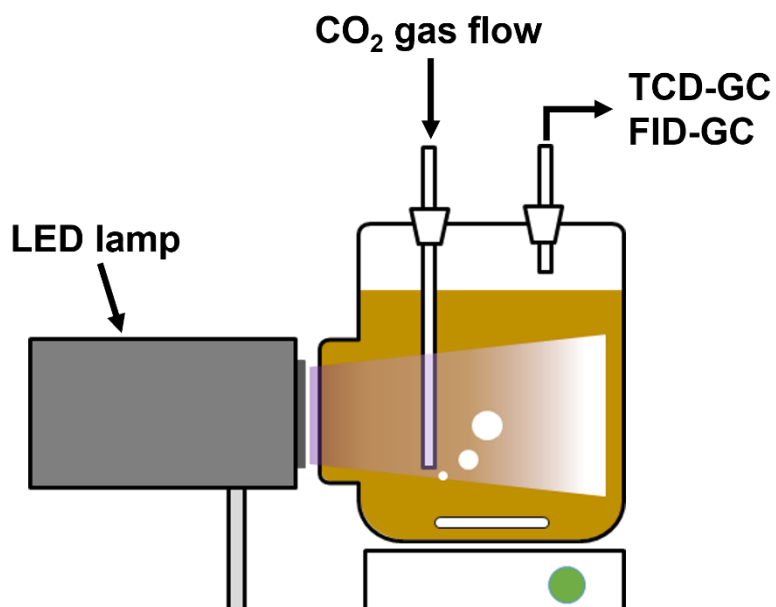

**The calculation of the apparent quantum efficiency (AQE)**

$$\text{AQE (\%)} = \frac{\text{number of reacted electrons}}{\text{number of incident photons}} \times 100$$

Number of reacted electrons

= 2 × total amount of substance of the photogenerated CO and H<sub>2</sub> during 1 h reaction

$$= 2 \times (20 + 0.057) \times 10^{-6} \times N_A$$

Where  $N_A$  is the Avogadro constant of  $6.0 \times 10^{23} \text{ mol}^{-1}$ .

Number of incident photons

= totally given light energy to photocatalyst for 1 h / energy per photon at 365 nm

$$= W \times S \times 3600 / h \times c / (365 \times 10^{-9})$$

Where  $W$ ,  $S$ ,  $h$  and  $c$  is the detected power of  $400 \text{ mW cm}^{-2}$ , the photo-irradiated area on reaction vessel of  $20 \text{ cm}^{-2}$ , Planck constant of  $6.6 \times 10^{-34} \text{ J s}$  and speed of light of  $3.0 \times 10^8$ .

Therefore, number of incident photons

$$= 400 \times 10^{-3} \times 20 \times 3600 / (6.6 \times 10^{-34} \times 3.0 \times 10^8) / (365 \times 10^{-9}) = 5.3 \times 10^{22}$$

From the above, AQE (%) =  $2 \times (20 + 0.057) \times 10^{-6} \times 6.0 \times 10^{23} / (5.3 \times 10^{22}) \times 100 = 0.045 \%$
